# Supplementary material
Source: publisher site journal article supplement (https://www.dovepress.com/article/238503)
Supplement: Supplementary file 1 [file get_supplementary_file.php]

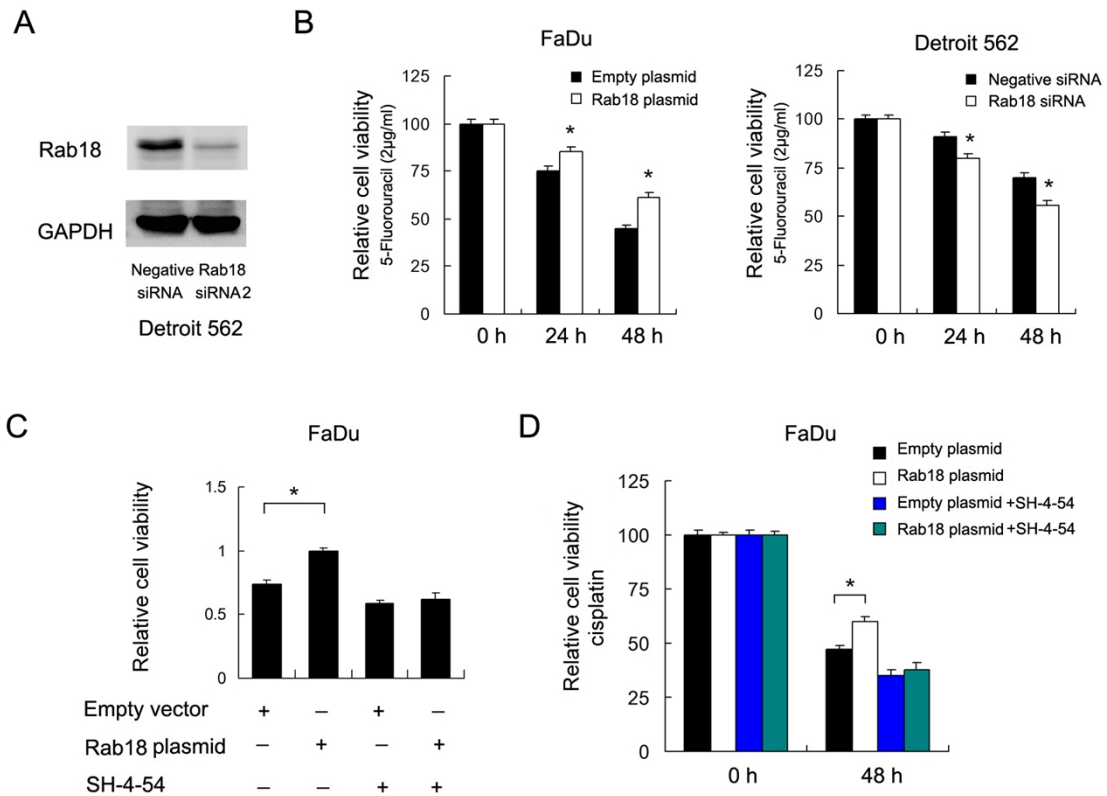

### Supplementary Figure 1.

A. Rab18 siRNA2 significantly reduced protein expression of Rab18. B. A. MTT demonstrated that Rab18 overexpression decreased inhibition rate while Rab18 depletion increased inhibition rate in cancer cells treated with 2µg/mL 5-Fu. C. MTT showed that STAT3 inhibitor SH-4-54 abolished the effects of Rab18 on FaDu cell proliferation. D. Rab18 failed to upregulate FaDu cisplatin resistance in SH-4-54 treated cells. \*  $p < 0.05$
